# Supplementary material
Source: PubMed Central journal article supplement (PMC2224181)

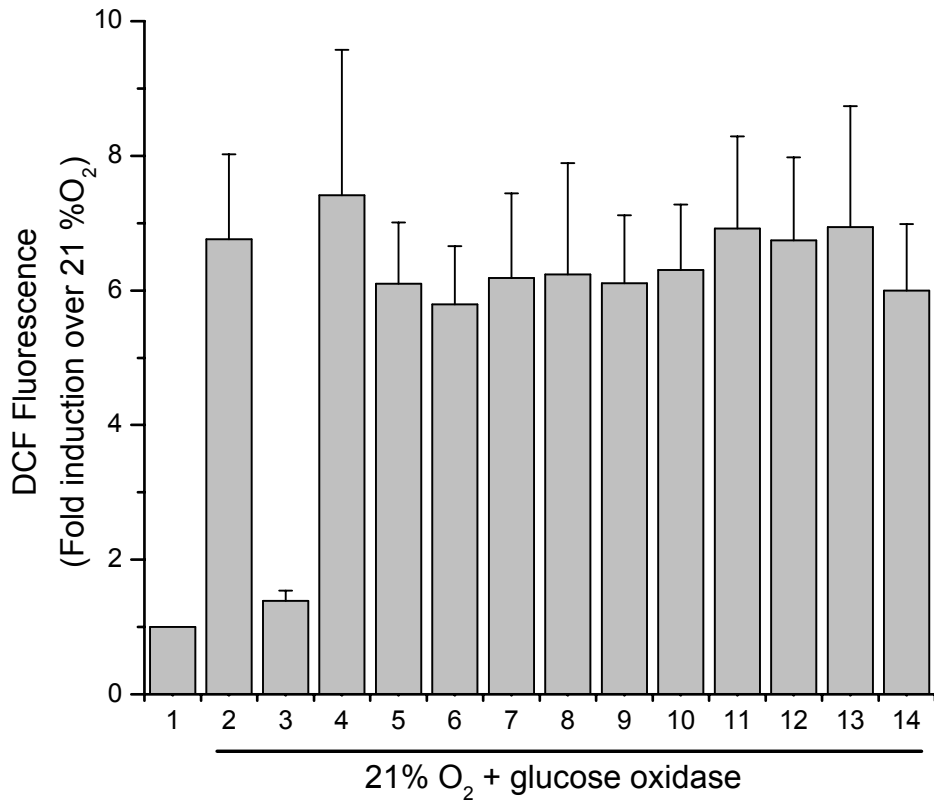

1. No treatment
2. DMSO
3. Catalase
4. C1
5. C2
6. C3
7. C4
8. C5
9. C6
10. C7
11. C8
12. C9
13. C10
14. C11

Supplement: pnas_0706585104_1.pdf [file pnas_0706585104_1.pdf]

DCF Fluorescence

(Fold induction over 21% O<sub>2</sub>)

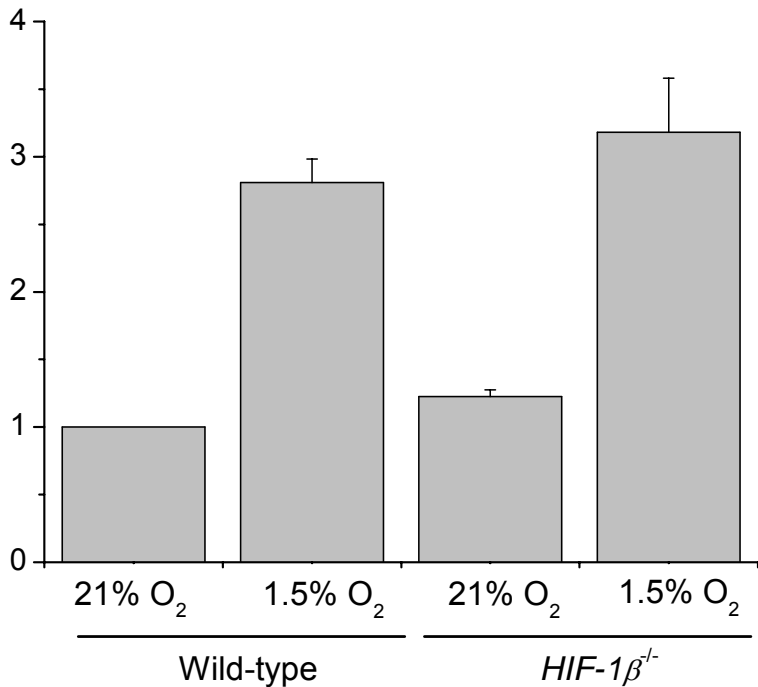

Supplement: pnas_0706585104_2.pdf [file pnas_0706585104_2.pdf]

**A.**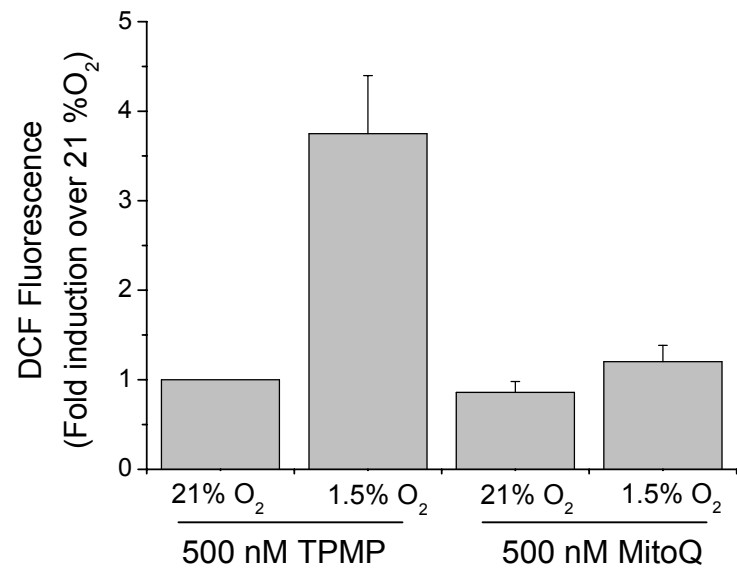**C.**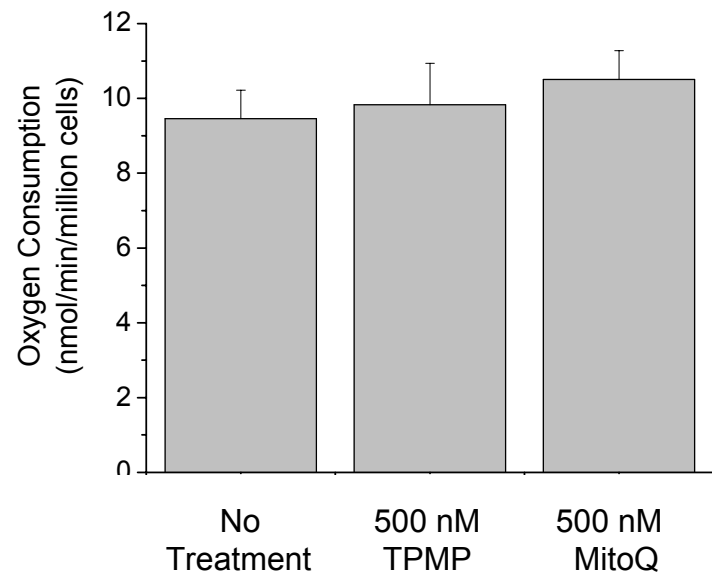**B.**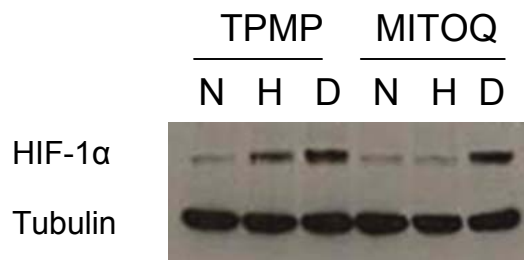**D.**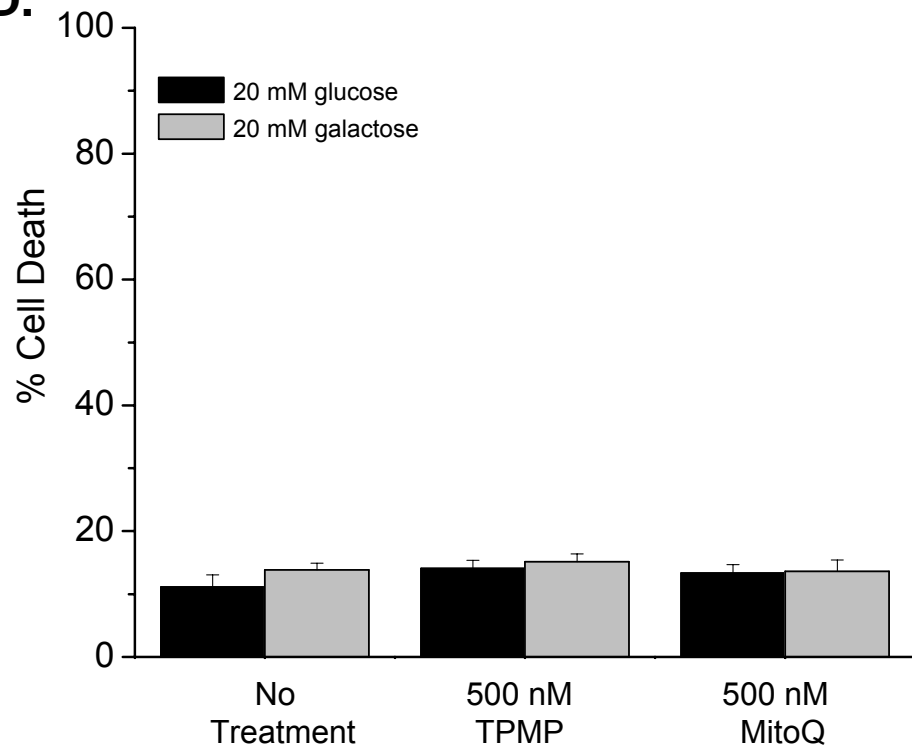

Supplement: pnas_0706585104_3.pdf [file pnas_0706585104_3.pdf]

# Ubiquinone cycle generates superoxide.

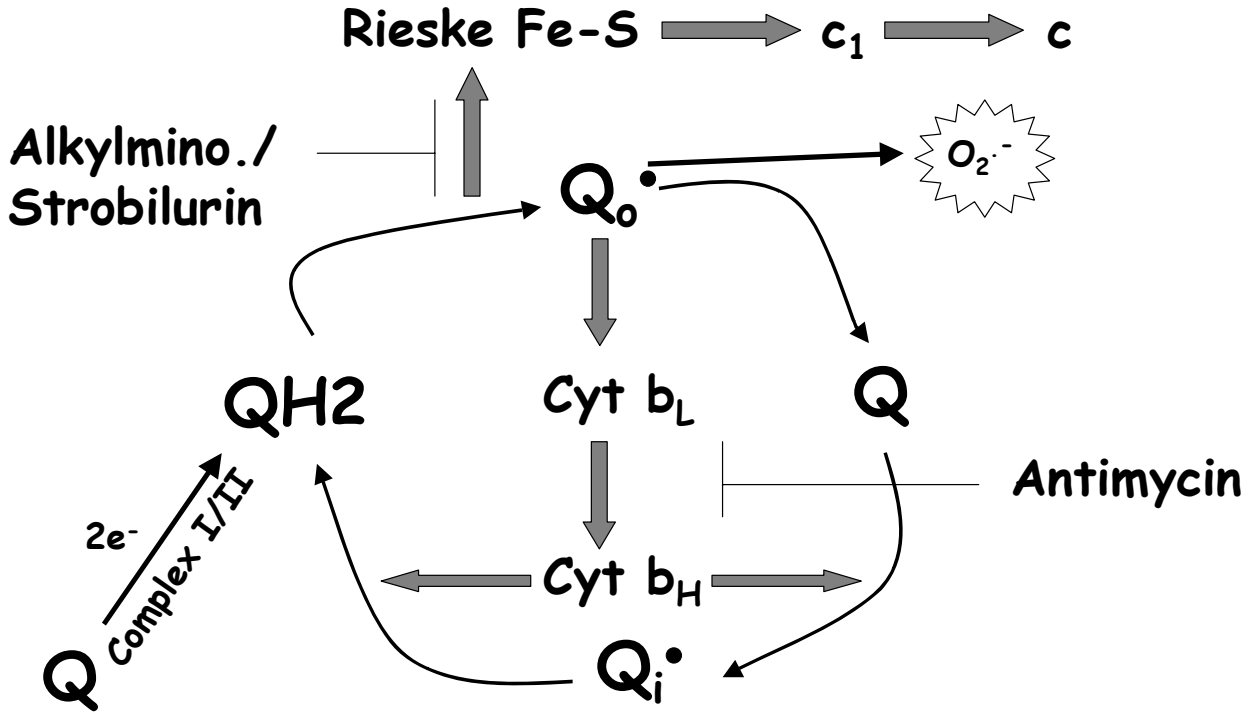

Supplement: pnas_0706585104_4.pdf [file pnas_0706585104_4.pdf]

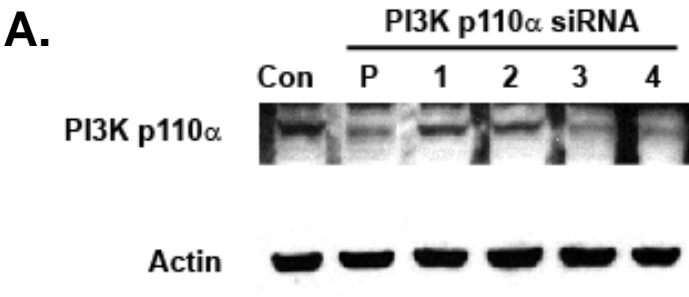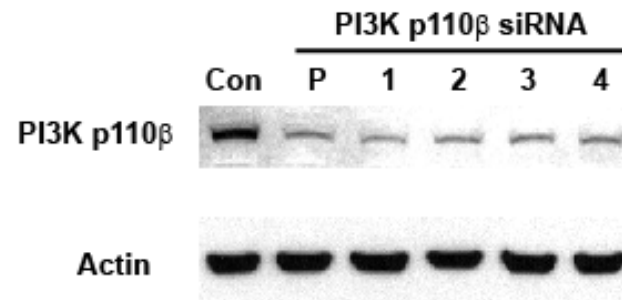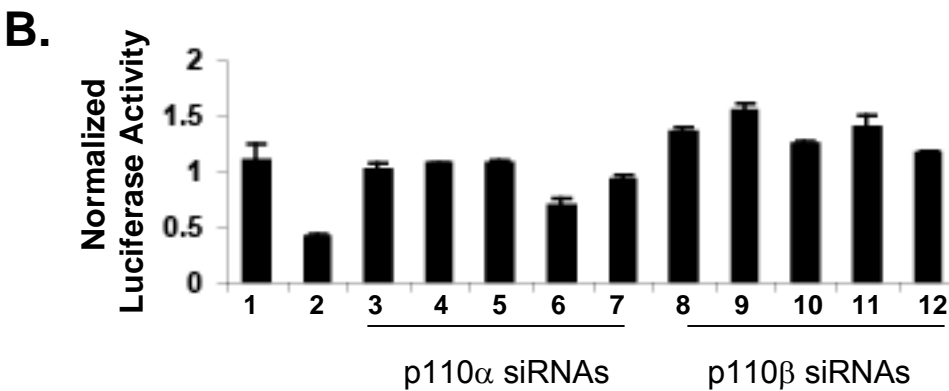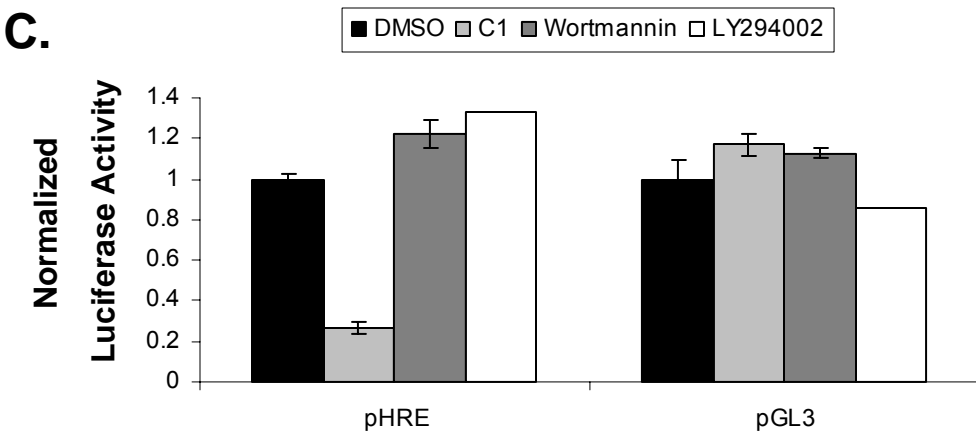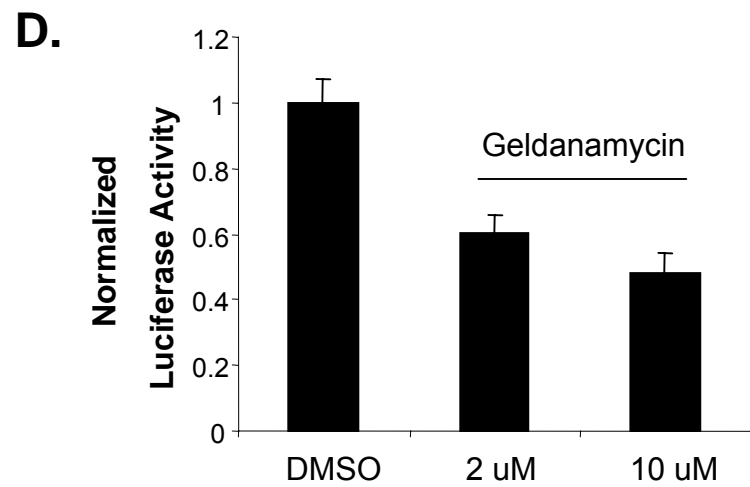

Supplement: pnas_0706585104_5.pdf [file pnas_0706585104_5.pdf]

**Table 1. Additional alkyliminophenylacetate compounds**

**Compounds**

**IC 50**

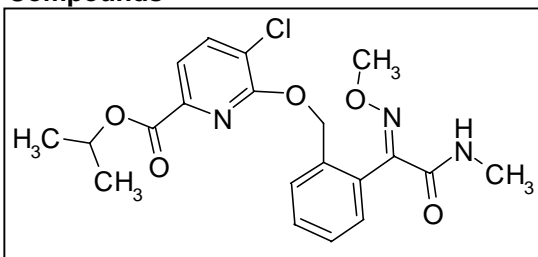

0.089610

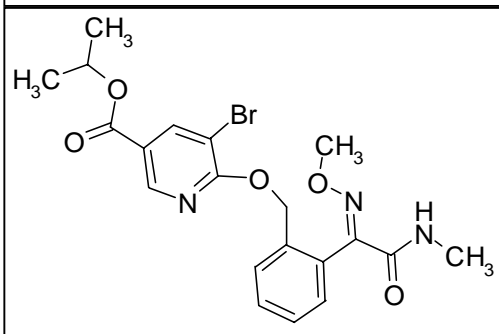

0.026520

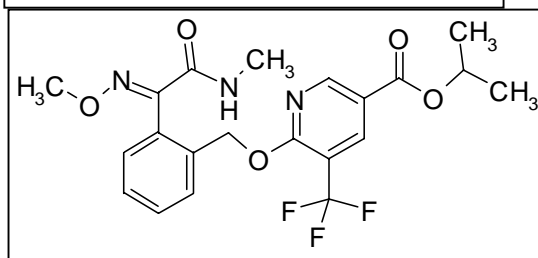

0.022860

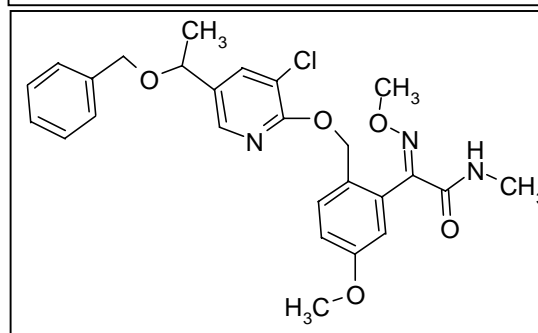

0.008925

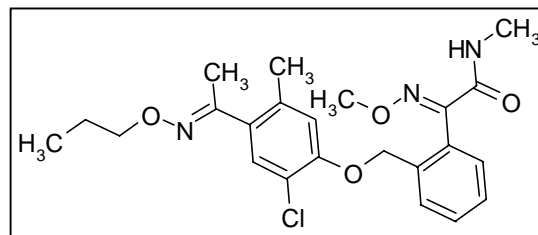

0.012810

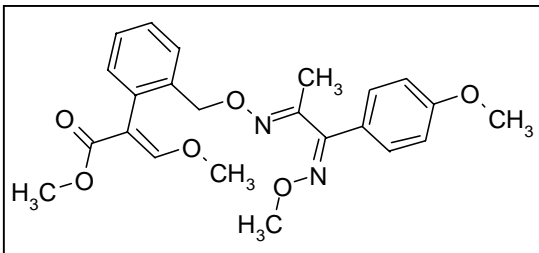

0.024330

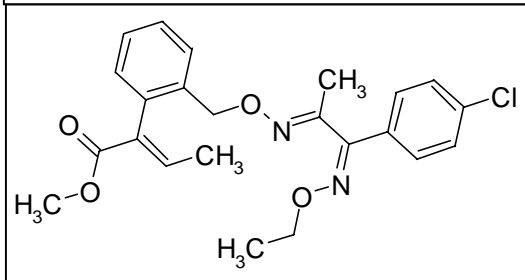

0.106400

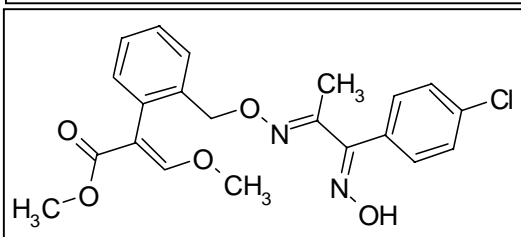

0.075080

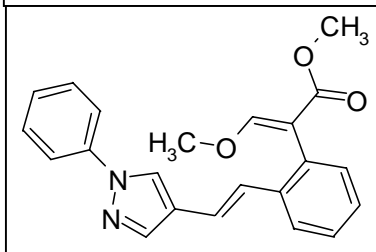

0.024740

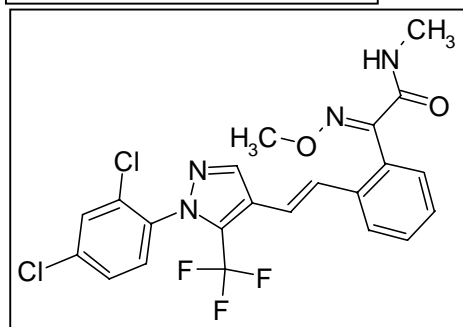

0.001582

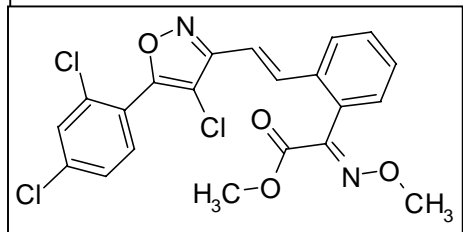

0.051350

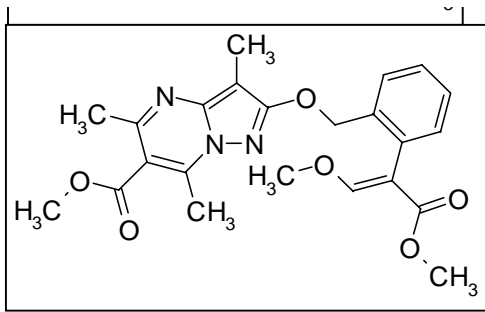

0.002426

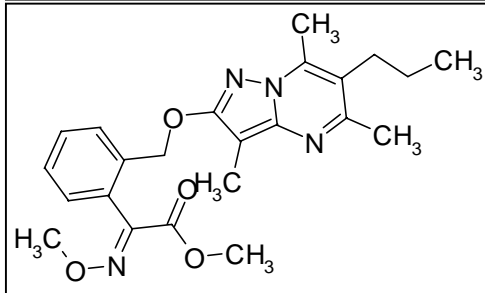

0.035400

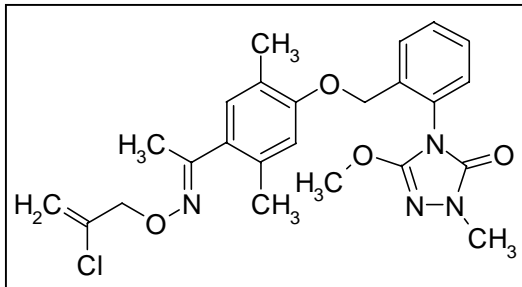

0.062090

Supplement: pnas_0706585104_6.pdf [file pnas_0706585104_6.pdf]
